# Supplementary material for: Controlled electrodeposition of nanostructured Pd thin films from protic ionic liquids for electrocatalytic oxygen reduction reactions
Source: Royal Society of Chemistry journal article supplement (doi:10.1039/c5ra13898a), 2015-01-01
Supplement: c5ra13898a1.pdf [file c5ra13898a1.pdf]

## Supporting Information

### Controlled Electrodeposition of Nanostructured Pd Thin Films From Protic Ionic Liquids for Electrocatalytic Oxygen Reduction Reactions

Majid Asnavandi, Bryan H. R. Suryanto, Chuan Zhao<sup>1</sup>

School of Chemistry, The University of New South Wales, Sydney, NSW 2052, Australia

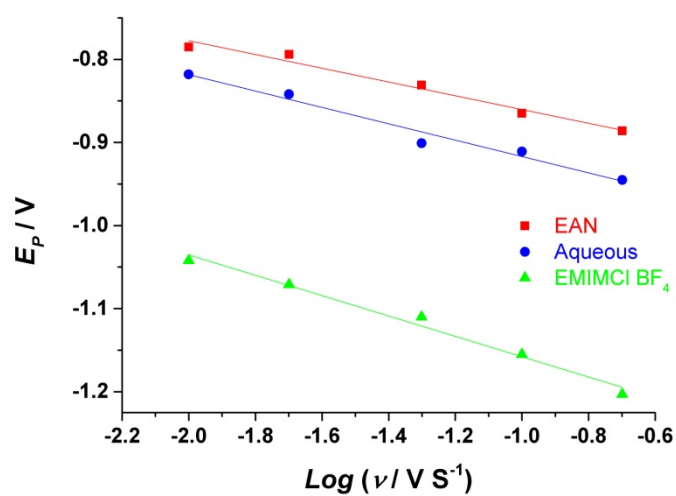

Figure S1. Dependence of peak potential,  $E_p$  on  $\log u$

<sup>1</sup> Corresponding author: Tel: +61 2 9385 4645; Fax: +61 2 9385 6141. E-mail address: [chuan.zhao@unsw.edu.au](mailto:chuan.zhao@unsw.edu.au)

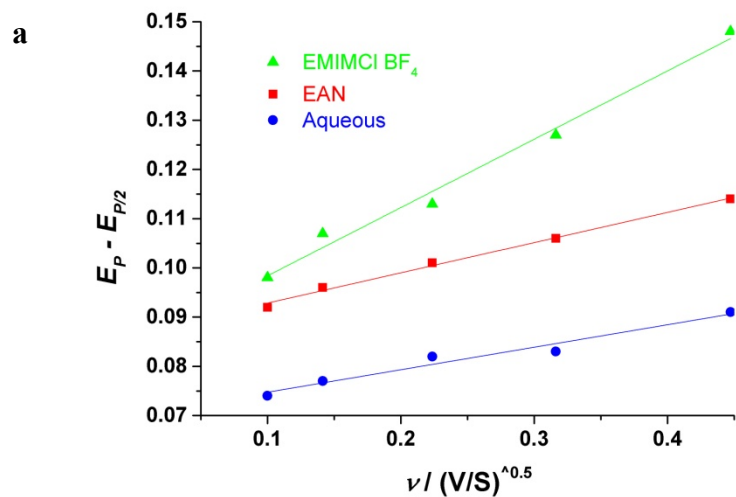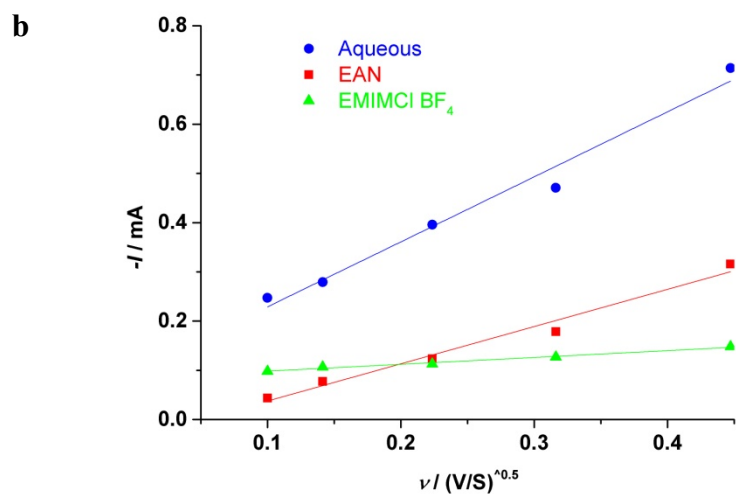

Figure S2. Analyzed curves extracted from cyclic voltammograms for electrodeposition of Pd from different electrolytes, a) dependence of  $E_p - E_{p/2}$  on  $U^{1/2}$  for charge transfer coefficient determination, b) dependence of  $I_p$  on  $U^{1/2}$  for diffusion coefficient determination

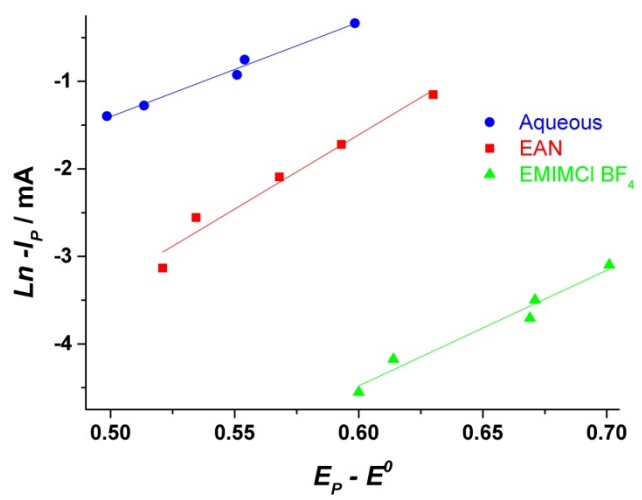

Figure S3. Kinetic constant calculation for Pd reduction

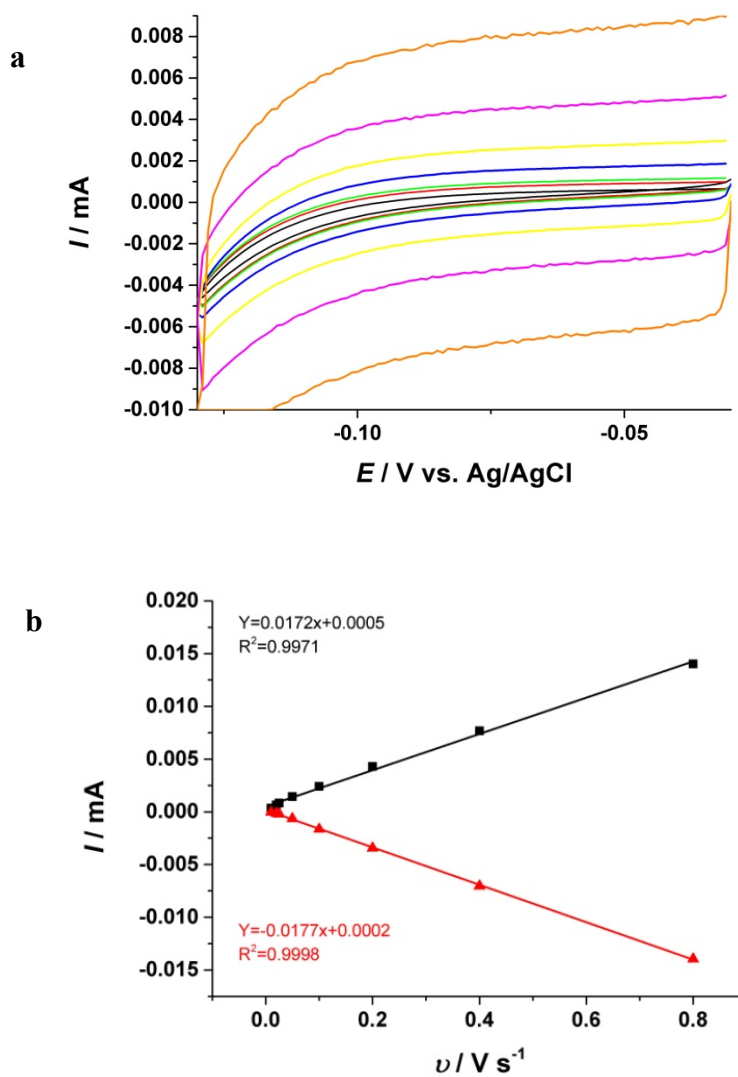

Figure S4. Double-layer capacitance measurements for determining ECSA of Pd electrodeposited from EAN in 1 M KOH, a) cyclic voltammetry in a non-Faradaic region of the voltammogram at scan rates of 0.01, 0.02, 0.025, 0.05, 0.1, 0.2, 0.4, and 0.8 V/S. b) cathodic and anodic currents at -0.08 V vs. Ag/AgCl versus scan rate
